# Supplementary material for: P-Glycoprotein Exacerbates Brain Injury Following Experimental Cerebral Ischemia by Promoting Proinflammatory Microglia Activation
Source: Hindawi journal article supplement (doi:10.1155/2023/6916819), 2023-12-16
Supplement: f1 [file 6916819.f1.pdf]

| <b>Target gene</b>   | <b>Primer type</b> | <b>Sequence</b>           |
|----------------------|--------------------|---------------------------|
| Mouse IL-6           | Forward            | ACTTGCCTGGTGAAAATCAT      |
|                      | Reverse            | CAGGAACTGGATCAGGACTT      |
| Mouse IL-12          | Forward            | CTGTGCCTTGGTAGCATCTATG    |
|                      | Reverse            | GCAGAGTCTCGCCATTATGATTC   |
| Mouse IL-4           | Forward            | GGTCTCAACCCCCAGCTAGT      |
|                      | Reverse            | GCCGATGATCTCTCTCAAGTGAT   |
| Mouse YM-1           | Forward            | CAAGTTGAAGGCTCAGTGGCTC    |
|                      | Reverse            | CAAATCATTGTGTAAAGCTCCTCTC |
| Mouse CD16           | Forward            | TATGGCACCTTAGCGTGATG      |
|                      | Reverse            | CGACCCTGTAGATCTGGGAG      |
| Mouse iNOS           | Forward            | CCCTTCAATGGTTGGTACATGG    |
|                      | Reverse            | ACATTGATCTCCGTGACAGCC     |
| Mouse CD206          | Forward            | CCATTACAACCAAAGCTGACCAAA  |
|                      | Reverse            | TCACAATCAGGAGGACCACGG     |
| Mouse Arg-1          | Forward            | TCACCTGAGCTTTGATGTCTG     |
|                      | Reverse            | CTGAAAGGAGCCCTGTCTTG      |
| Mouse CCL2           | Forward            | AGTCTCTGCCGCCCTTCT        |
|                      | Reverse            | GTGACTGGGGCATTGATTG       |
| Mouse CCR2           | Forward            | ATCCACGGCATACTATCAACATC   |
|                      | Reverse            | AAGGCTCACCATCATCGTAG      |
| Mouse MIP-1 $\alpha$ | Forward            | CAGCGAGTACCAGTCCCTTTT     |
|                      | Reverse            | CCTCGCTGCCTCCAAGA         |
| Mouse CCR5           | Forward            | TTCTGGGCTCCCTACAACATT     |
|                      | Reverse            | TTGGTCCAACCTGTTAGAGCTA    |
| Mouse CXCL8          | Forward            | GACAGCAGAGCACACAAGC       |
|                      | Reverse            | GGCAAACCTGCACCTTCAC       |
| Mouse CXCR1          | Forward            | TGAACATGGCTGGTGATTGAG     |
|                      | Reverse            | CAGTAGGCTTAGCAGGAAGACCA   |
| Mouse CXCR2          | Forward            | GATACCCGCCACCCAGGATT      |
|                      | Reverse            | AGCAGGAAGACAAGGGCATAGA    |
| Mouse $\beta$ -actin | Forward            | CATCCGTAAAGACCTCTATGCCAAC |
|                      | Reverse            | ATGGTGCCACCGATCCACA       |
