# Supplementary figures and images for: P-Glycoprotein Exacerbates Brain Injury Following Experimental Cerebral Ischemia by Promoting Proinflammatory Microglia Activation
Source: Hindawi journal article supplement (doi:10.1155/2023/6916819), 2023-12-16

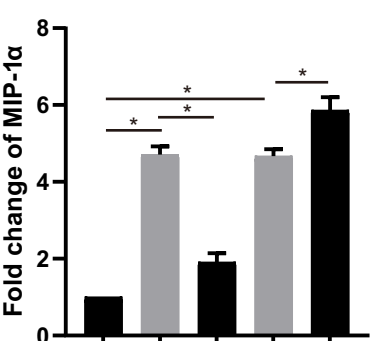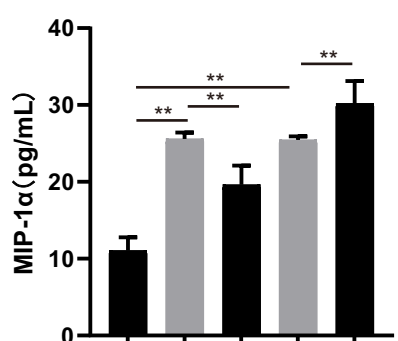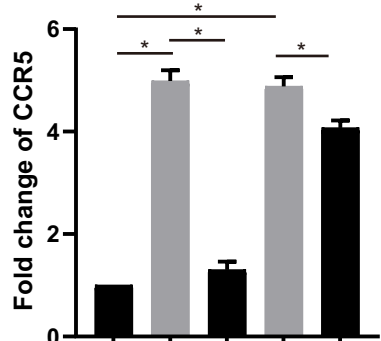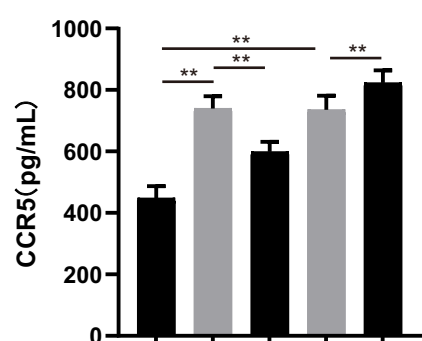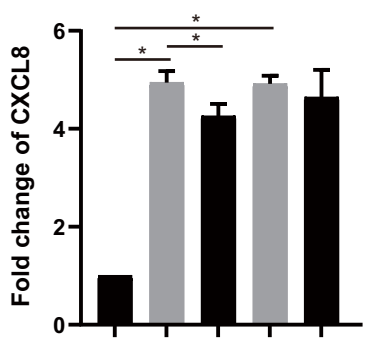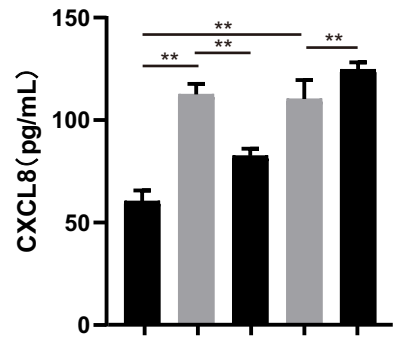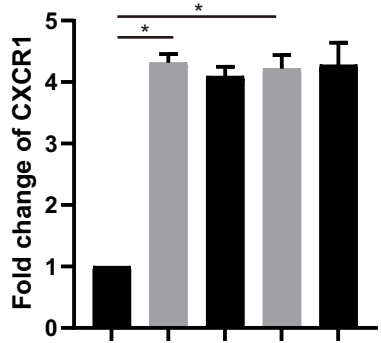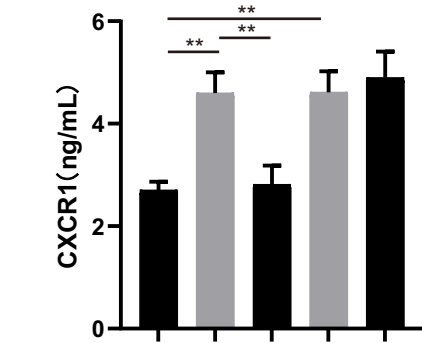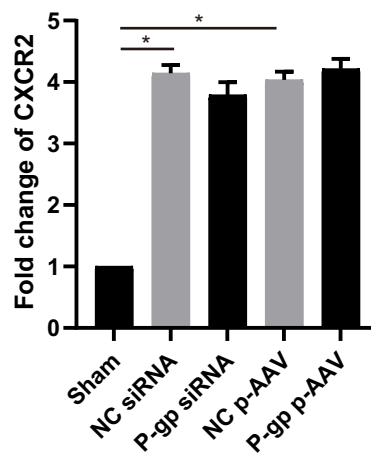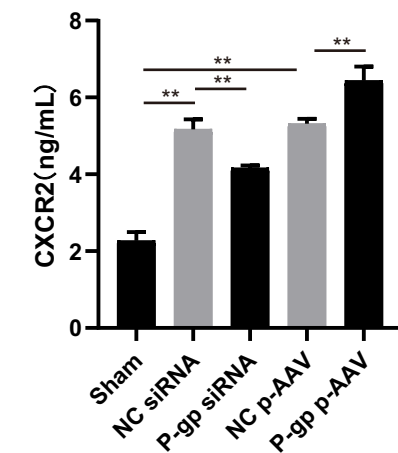

Supplement: f2 [file 6916819.f2.pdf]

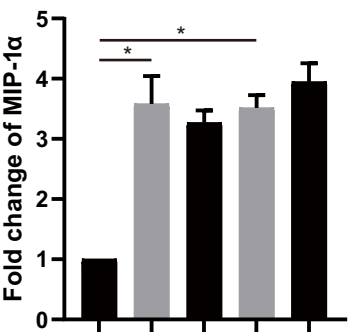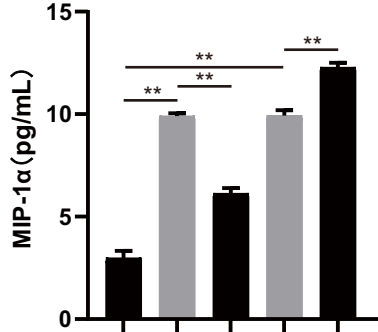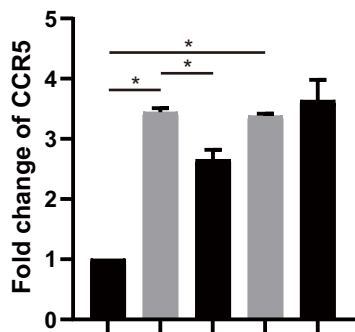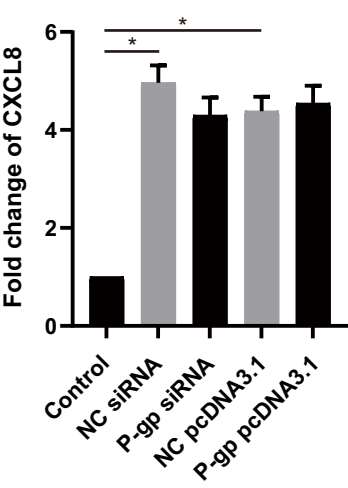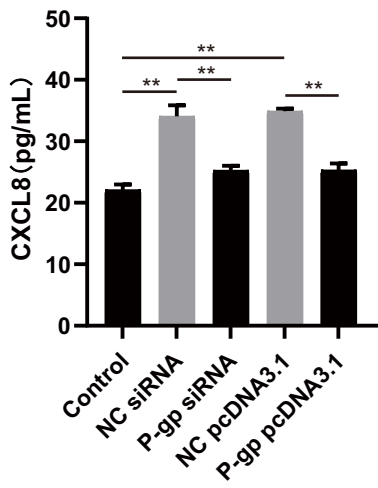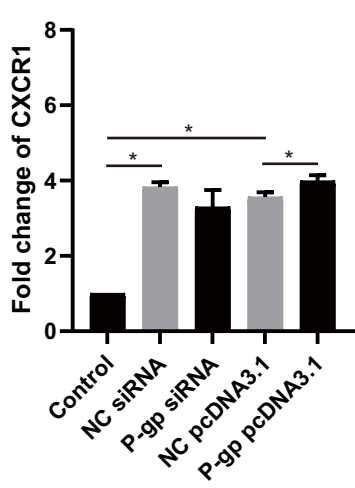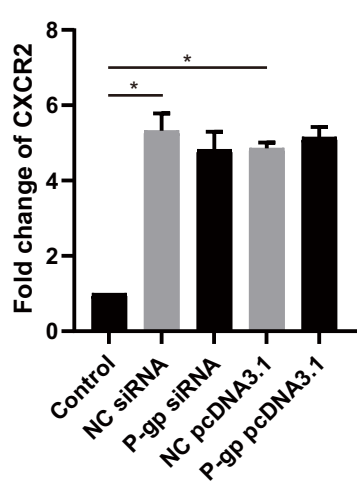

Supplement: f3 [file 6916819.f3.pdf]
